# Supplementary material
Source: PubMed Central journal article supplement (PMC6502759)
Supplement: NIHMS1515270-supplement-10552_2018_1099_MOESM1_ESM.pdf [file NIHMS1515270-supplement-10552_2018_1099_MOESM1_ESM.pdf]

**Supplementary Table 1. Differences in protein expression level in primary tumors comparing patients with recurrence to those without.**

|                                             | TWIST1 | SNAI1 | PAWR | $\beta$ -catenin | pCrk/CrkL |
|---------------------------------------------|--------|-------|------|------------------|-----------|
| <b>Intensity Score</b>                      |        |       |      |                  |           |
| All (n=475)                                 | H      |       |      |                  | L         |
| HER2+ (n=35)                                |        |       |      |                  |           |
| ER+/PR+/HER2- (n=282)                       |        |       |      |                  | L         |
| ER+/PR-/HER2- (n=32)                        |        |       |      |                  |           |
| ER-/PR-/HER2- (n=75)                        | H      | H     |      |                  |           |
| <b>Allred Score</b>                         |        |       |      |                  |           |
| All (n=475)                                 | H      |       |      |                  | L         |
| HER2+ (n=35)                                |        |       |      |                  |           |
| ER+/PR+/HER2- (n=282)                       |        |       |      |                  | L         |
| ER+/PR-/HER2- (n=32)                        |        |       |      |                  |           |
| ER-/PR-/HER2- (n=75)                        |        | H     |      |                  |           |
| <b>Total Score (Intensity x Percentage)</b> |        |       |      |                  |           |
| All (n=475)                                 | H      |       |      |                  | L         |
| HER2+ (n=35)                                |        |       |      |                  |           |
| ER+/PR+/HER2- (n=282)                       | H      |       |      |                  | L         |
| ER+/PR-/HER2- (n=32)                        |        |       |      |                  |           |
| ER-/PR-/HER2- (n=75)                        |        | H     |      |                  |           |

*H- significantly higher level of protein in patients with recurrence than those without.*

*L- significantly lower level of protein in patients with recurrence than those without.*

*Blank indicates non-significant difference. Significance is based on Wilcoxon rank-sum test  $p < 0.05$*

**Article Title:** Potential Protein Markers for Breast Cancer Recurrence: A Retrospective Cohort Study

**Journal Name:** Cancer Causes & Control

**Author Names:** Chunyan He, Rina Plattner, Vivek Rangnekar, Binhua Zhou, Chunming Liu, Rachel L. Stewart, Bin Huang, Chi Wang, Thomas C. Tucker

**Affiliation and E-mail Addresses for Corresponding Authors:**

Dr. Chunyan He

[chunyan.he@uky.edu](mailto:chunyan.he@uky.edu)

Markey Cancer Center, University of Kentucky, Lexington, KY; Department of Internal Medicine, Division of Medical Oncology, College of Medicine, University of Kentucky, Lexington

Dr. Thomas Tucker

[tct@kcr.uky.edu](mailto:tct@kcr.uky.edu)

Department of Epidemiology, College of Public Health, University of Kentucky, Lexington, KY; Markey Cancer Center, University of Kentucky, Lexington, KY
