# Supplementary material
Source: PubMed Central journal article supplement (PMC6502759)
Supplement: NIHMS1515270-supplement-10552_2018_1099_MOESM2_ESM.pdf [file NIHMS1515270-supplement-10552_2018_1099_MOESM2_ESM.pdf]

**Supplementary Table 2. Detailed information on the sites of primary and recurrent tumors for the 22 patients.**

| <b>Patient</b> | <b>Primary Tumor</b>           | <b>Recurrent Tumor</b>                                     |
|----------------|--------------------------------|------------------------------------------------------------|
| 1              | right breast                   | uterus                                                     |
| 2              | left breast tissue             | left cerebellar tumor                                      |
| 3              | breast                         | right chest wall/radical resection of reconstructed breast |
| 4              | right breast                   | bone marrow                                                |
| 5              | breast, left                   | cervical lymph node                                        |
| 6              | left breast                    | pericardial tumor implant                                  |
| 7              | left breast                    | left axillary contents                                     |
| 8              | right breast                   | right chest wall                                           |
| 9              | left lateral breast needle loc | left axillary contents                                     |
| 10             | right breast                   | right lung                                                 |
| 11             | right partial mastectomy       | right supraclavicular lymph node                           |
| 12             | breast, left, mastectomy       | left reconstructed breast                                  |
| 13             | left partial mastectomy        | CUSA contents                                              |
| 14             | breast biopsy                  | right breast                                               |
| 15             | left partial mastectomy        | breast biopsy                                              |
| 16             | left breast                    | left superclavicular lymph node                            |
| 17             | left breast, lumpectomy        | left breast                                                |
| 18             | right breast                   | right chest wall                                           |
| 19             | right lumpectomy               | right axillary mass                                        |
| 20             | left breast                    | left cervical nodes                                        |
| 21             | right breast                   | right humeral lesion                                       |
| 22             | right breast                   | right axillary contents                                    |

**Article Title:** Potential Protein Markers for Breast Cancer Recurrence: A Retrospective Cohort Study

**Journal Name:** Cancer Causes & Control

**Author Names:** Chunyan He, Rina Plattner, Vivek Rangnekar, Binhua Zhou, Chunming Liu, Rachel L. Stewart, Bin Huang, Chi Wang, Thomas C. Tucker

**Affiliation and E-mail Addresses for Corresponding Authors:**

Dr. Chunyan He

[chunyan.he@uky.edu](mailto:chunyan.he@uky.edu)

Markey Cancer Center, University of Kentucky, Lexington, KY; Department of Internal Medicine, Division of Medical Oncology, College of Medicine, University of Kentucky, Lexington

Dr. Thomas Tucker

[tct@kcr.uky.edu](mailto:tct@kcr.uky.edu)

Department of Epidemiology, College of Public Health, University of Kentucky, Lexington, KY; Markey Cancer Center, University of Kentucky, Lexington, KY
