# Supplementary material
Source: PubMed Central journal article supplement (PMC6502759)

**Supplementary Figure 1. Box-and-whisker plots showing protein expression levels in primary tumors from breast cancer patients with and without recurrence in all breast cancer cases and in different tumor subtypes .** No Recur, no recurrence; Recur, recurrence. Blue dots: cases without recurrence; Yellow dots: cases with recurrence. The expression level of proteins were estimated using the total score (Intensity X Percentage) method. The pCrk/CrkL expression level is the combined levels from cytoplasm and nucleus. Results using the other two scoring methods (Intensity, Allred) are similar and not shown. P-value was obtained from Wilcoxon signed rank test. A, TWIST1; B, SNAL1; C, PAWR; D, WNT; E, pCrk/CrkL combined; F, pCrk/CrkL subcellular fractions.

**Article Title:** Potential Protein Markers for Breast Cancer Recurrence: A Retrospective Cohort Study

**Journal Name:** Cancer Causes & Control

**Author Names:** Chunyan He, Rina Plattner, Vivek Rangnekar, Binhua Zhou, Chunming Liu, Rachel L. Stewart, Bin Huang, Chi Wang, Thomas C. Tucker

**Affiliation and E-mail Addresses for Corresponding Authors:**

Dr. Chunyan He

[chunyan.he@uky.edu](mailto:chunyan.he@uky.edu)

Markey Cancer Center, University of Kentucky, Lexington, KY; Department of Internal Medicine, Division of Medical Oncology, College of Medicine, University of Kentucky, Lexington, KY

Dr. Thomas Tucker

[tct@kcr.uky.edu](mailto:tct@kcr.uky.edu)

Department of Epidemiology, College of Public Health, University of Kentucky, Lexington, KY; Markey Cancer Center, University of Kentucky, Lexington, KY

**a**

TWIST1

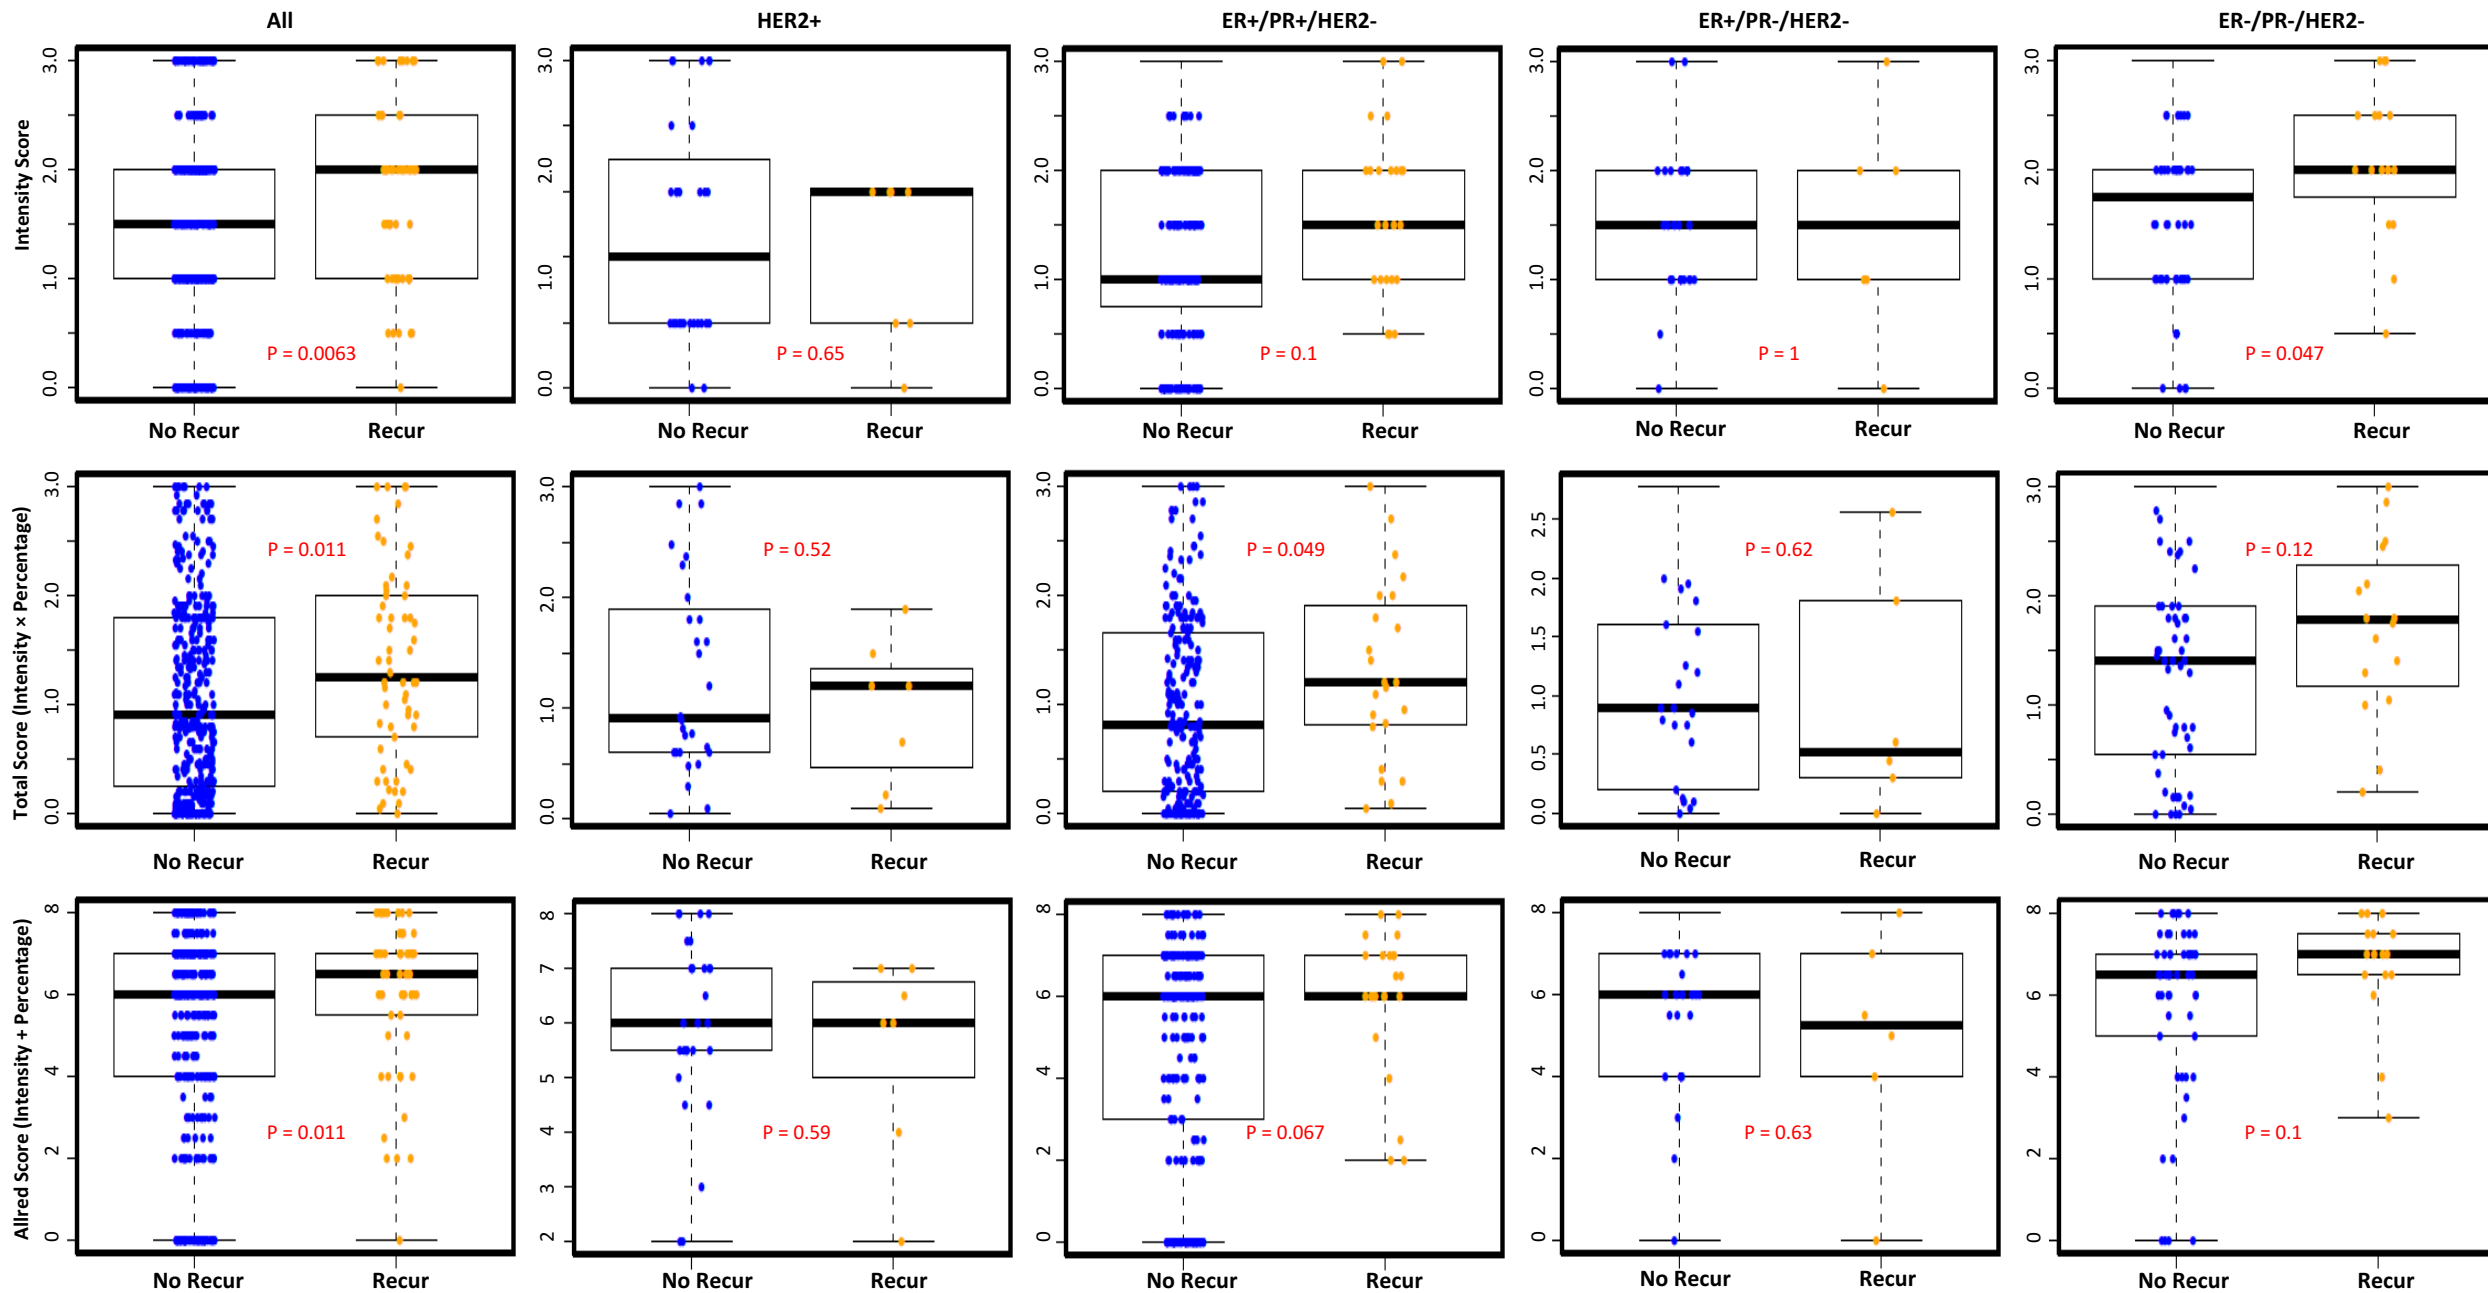

**b****SNAI1**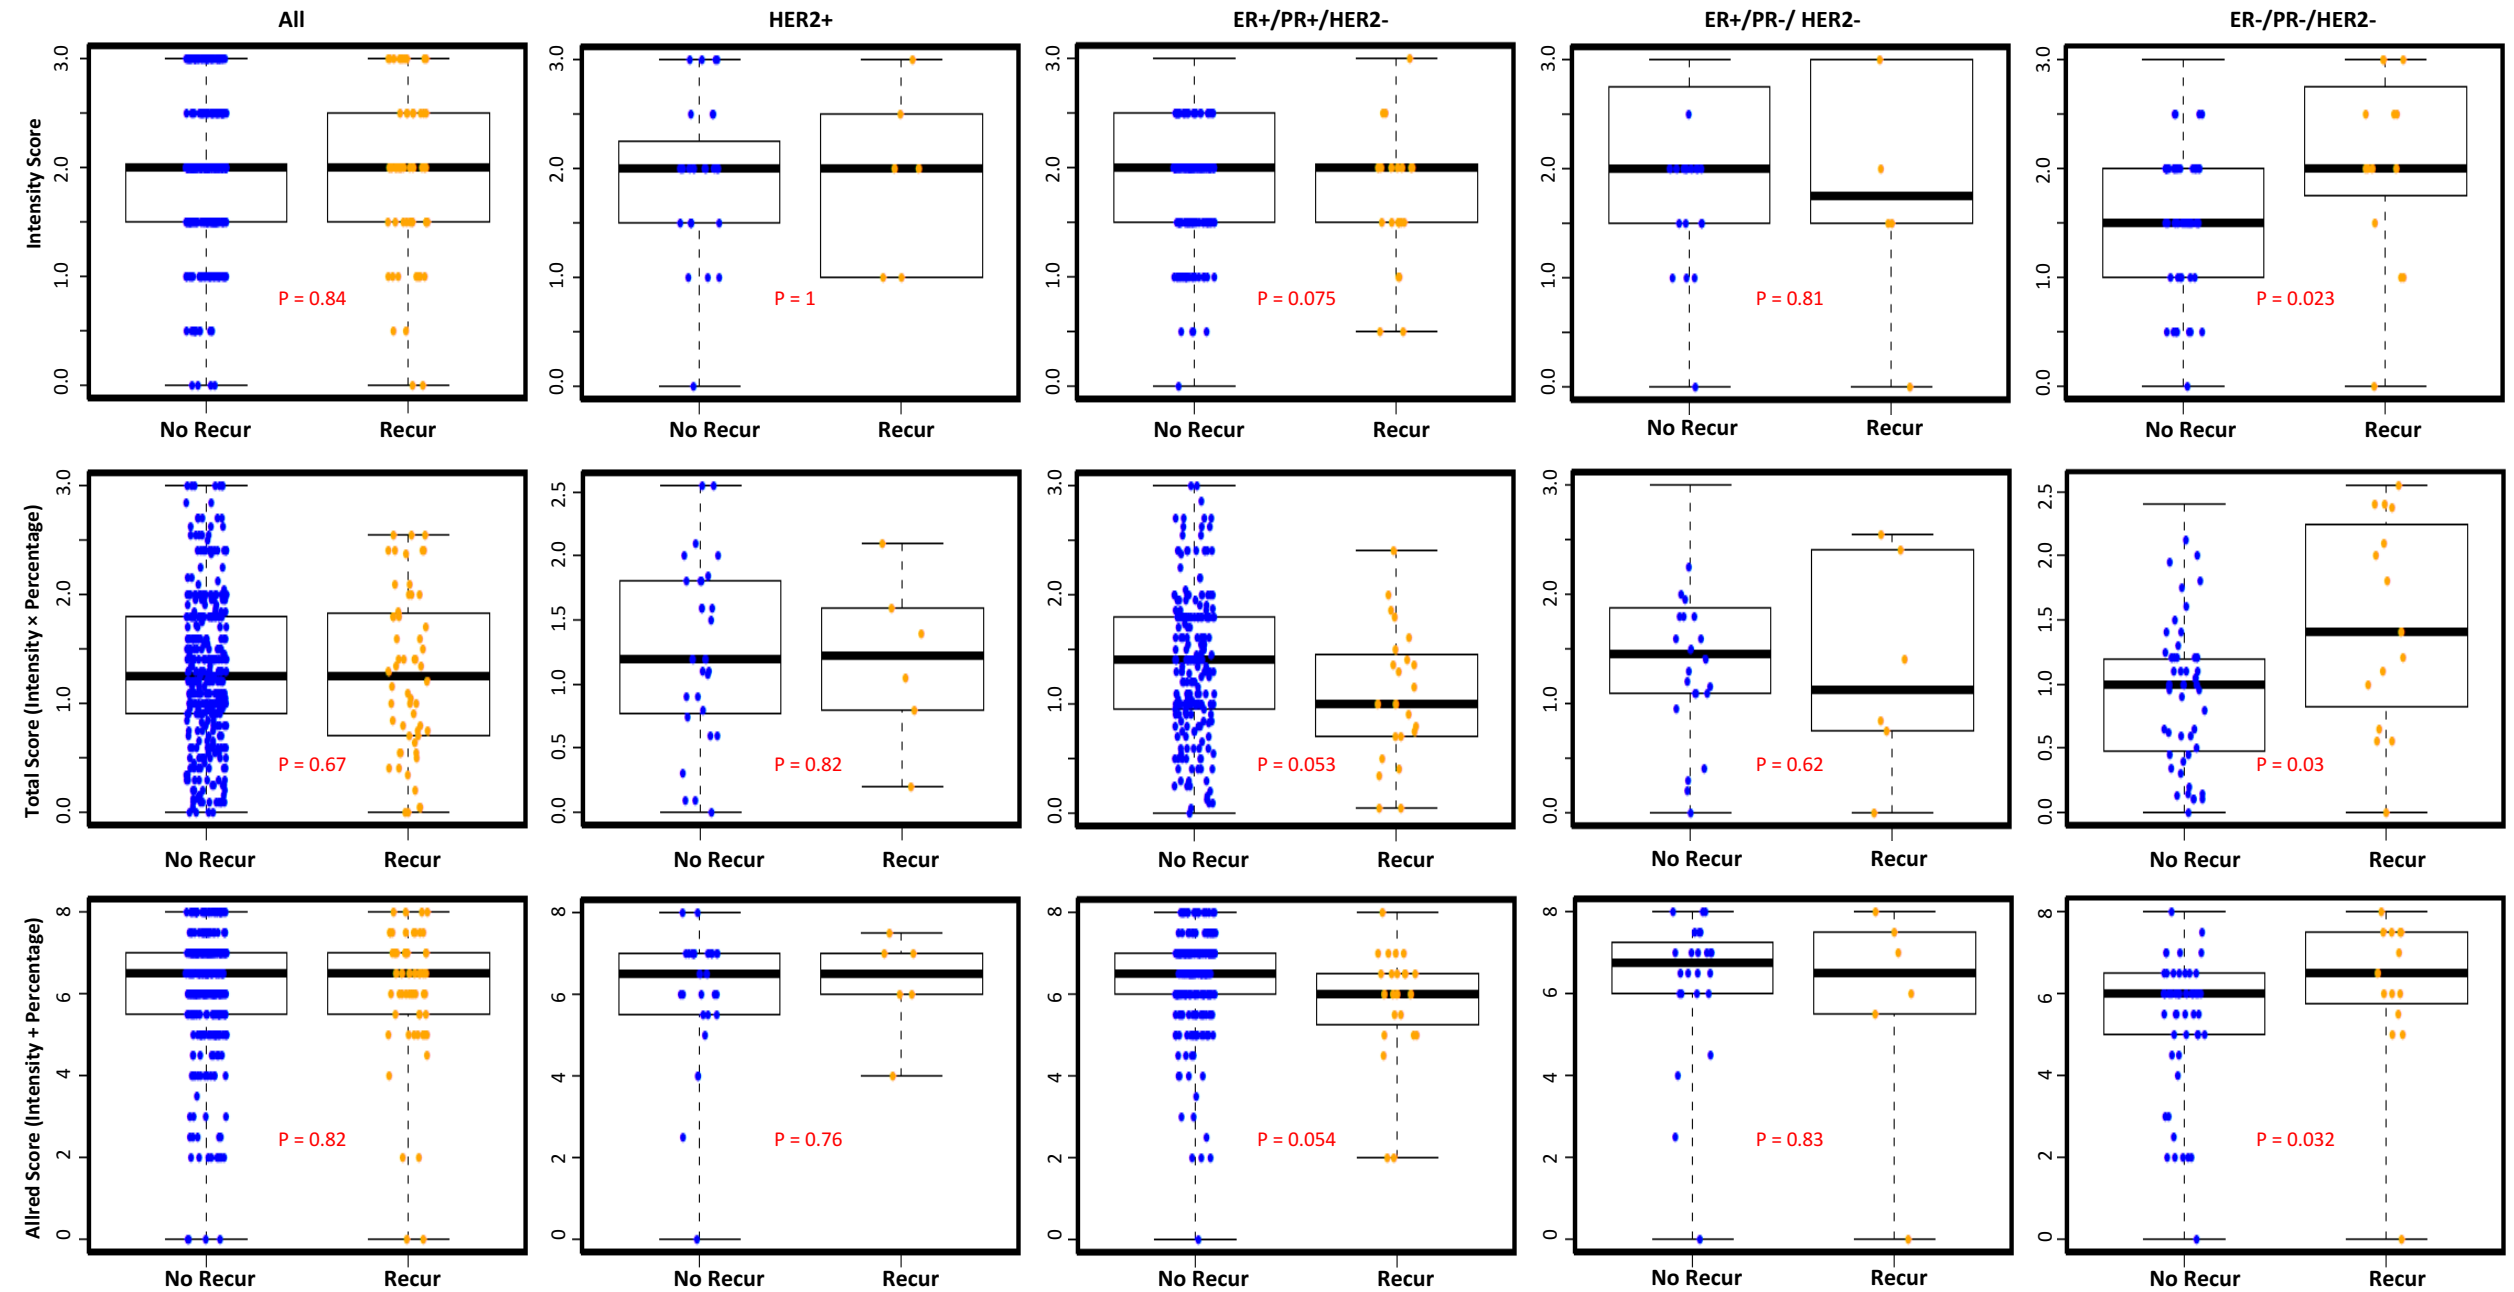

**C****PAWR**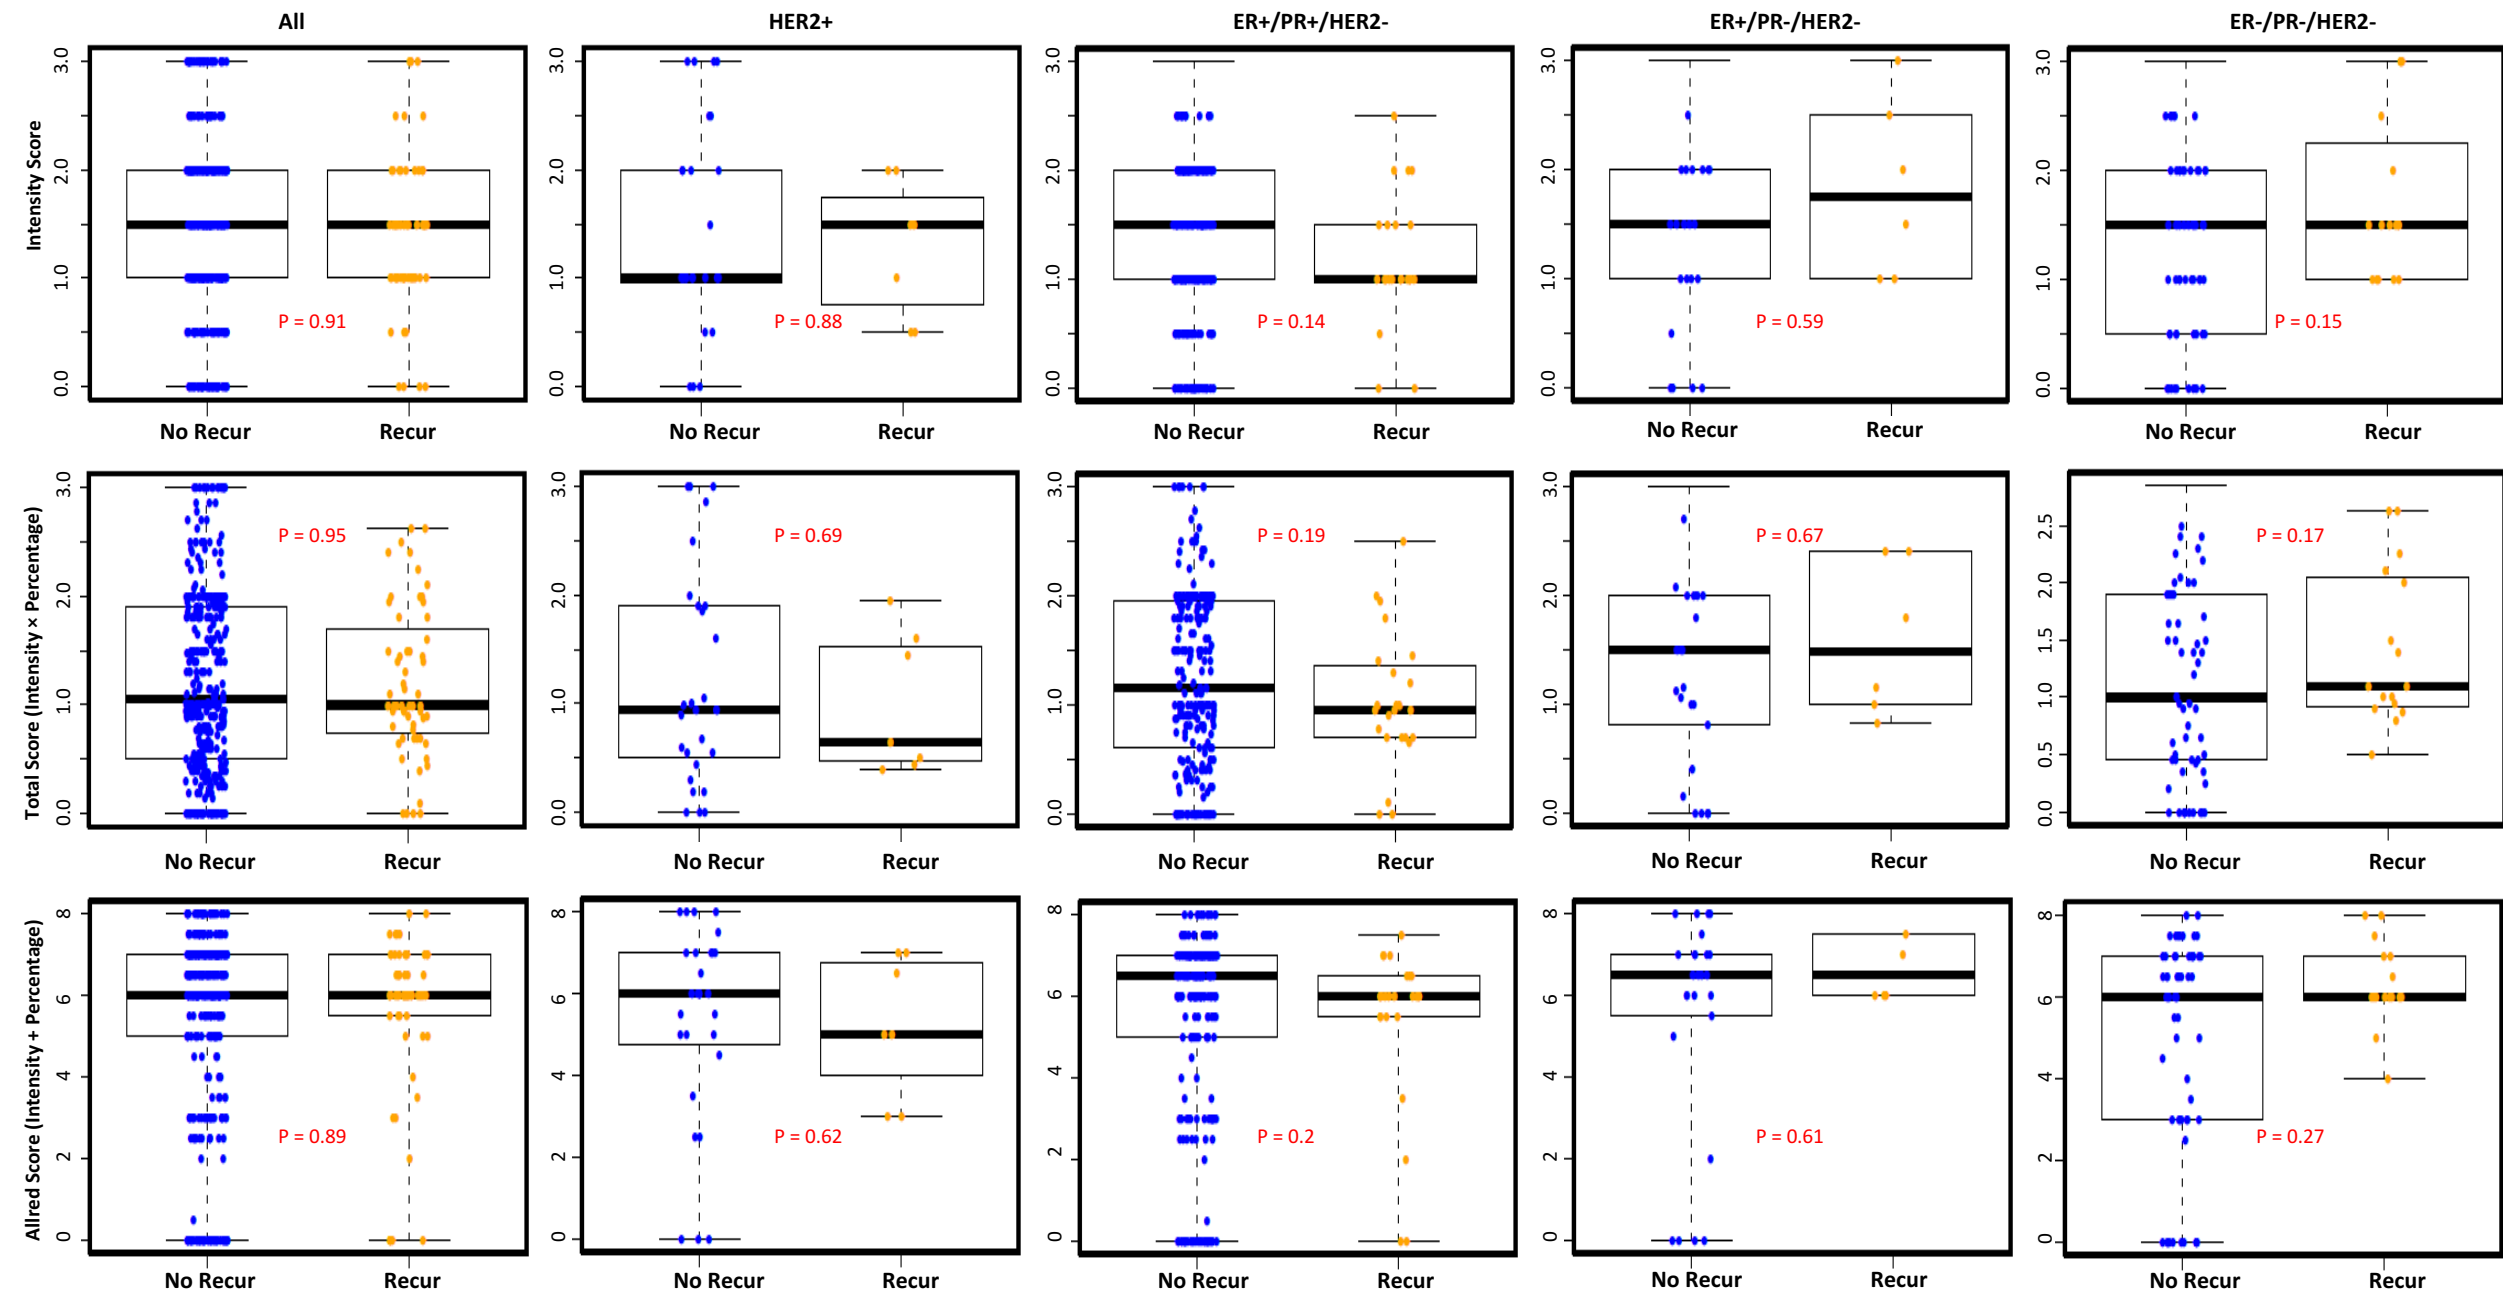

**a** **$\beta$ -catenin**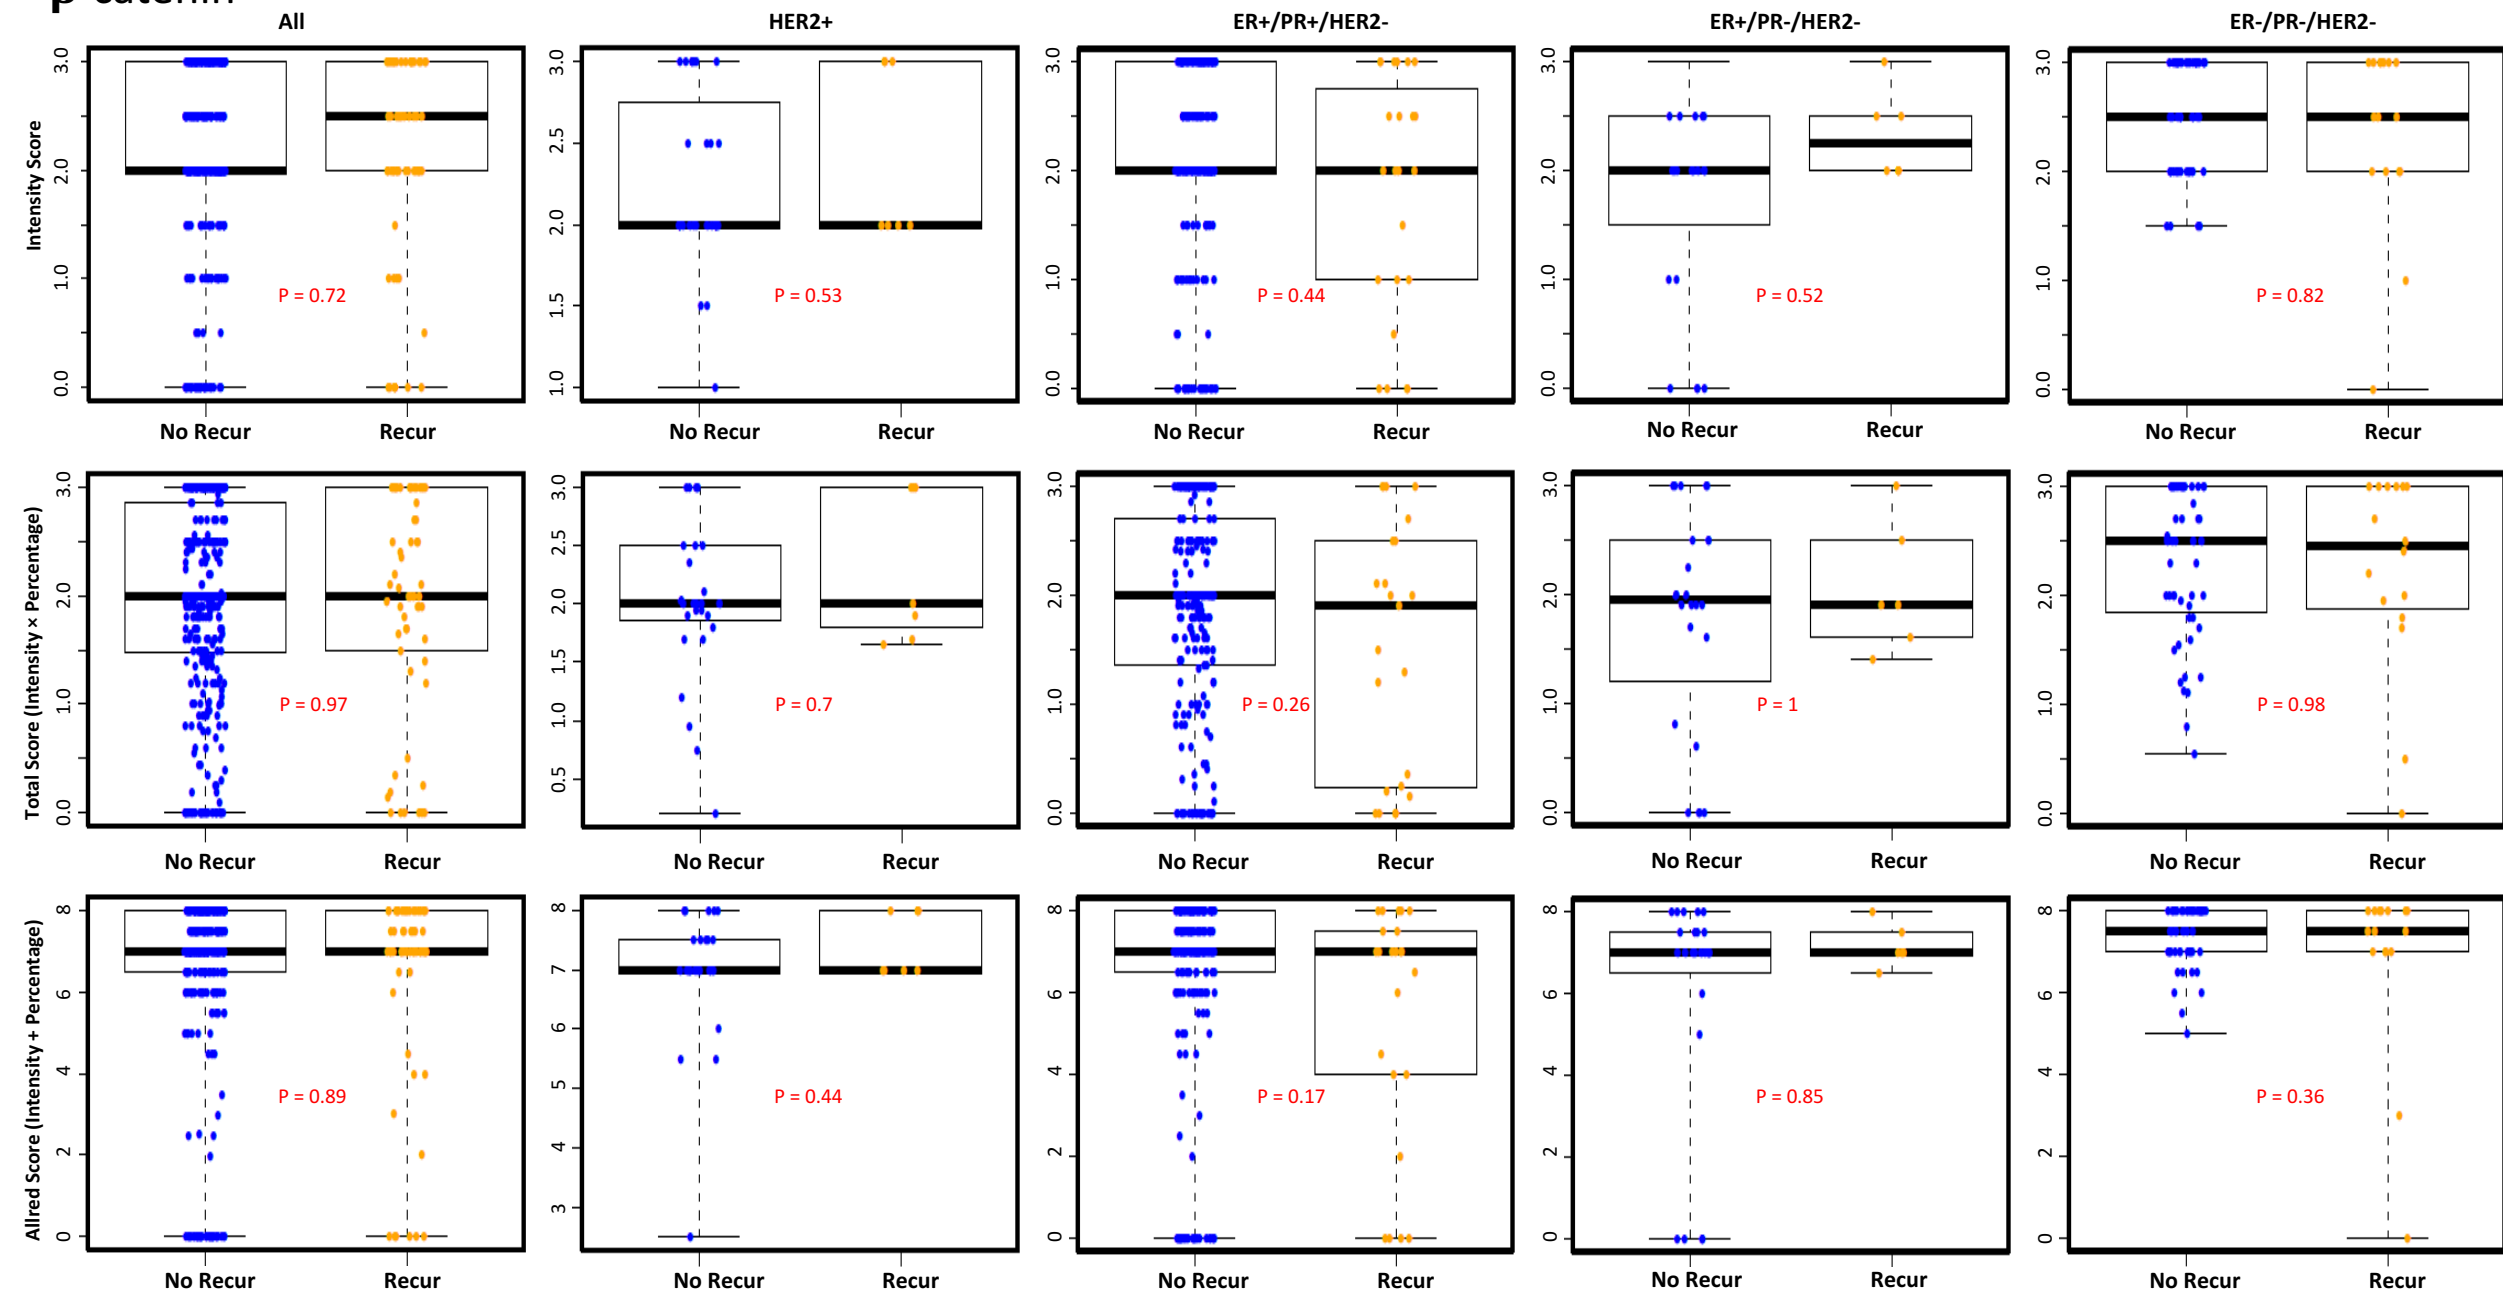

**e****pCrk/CrkL (COMBINED)**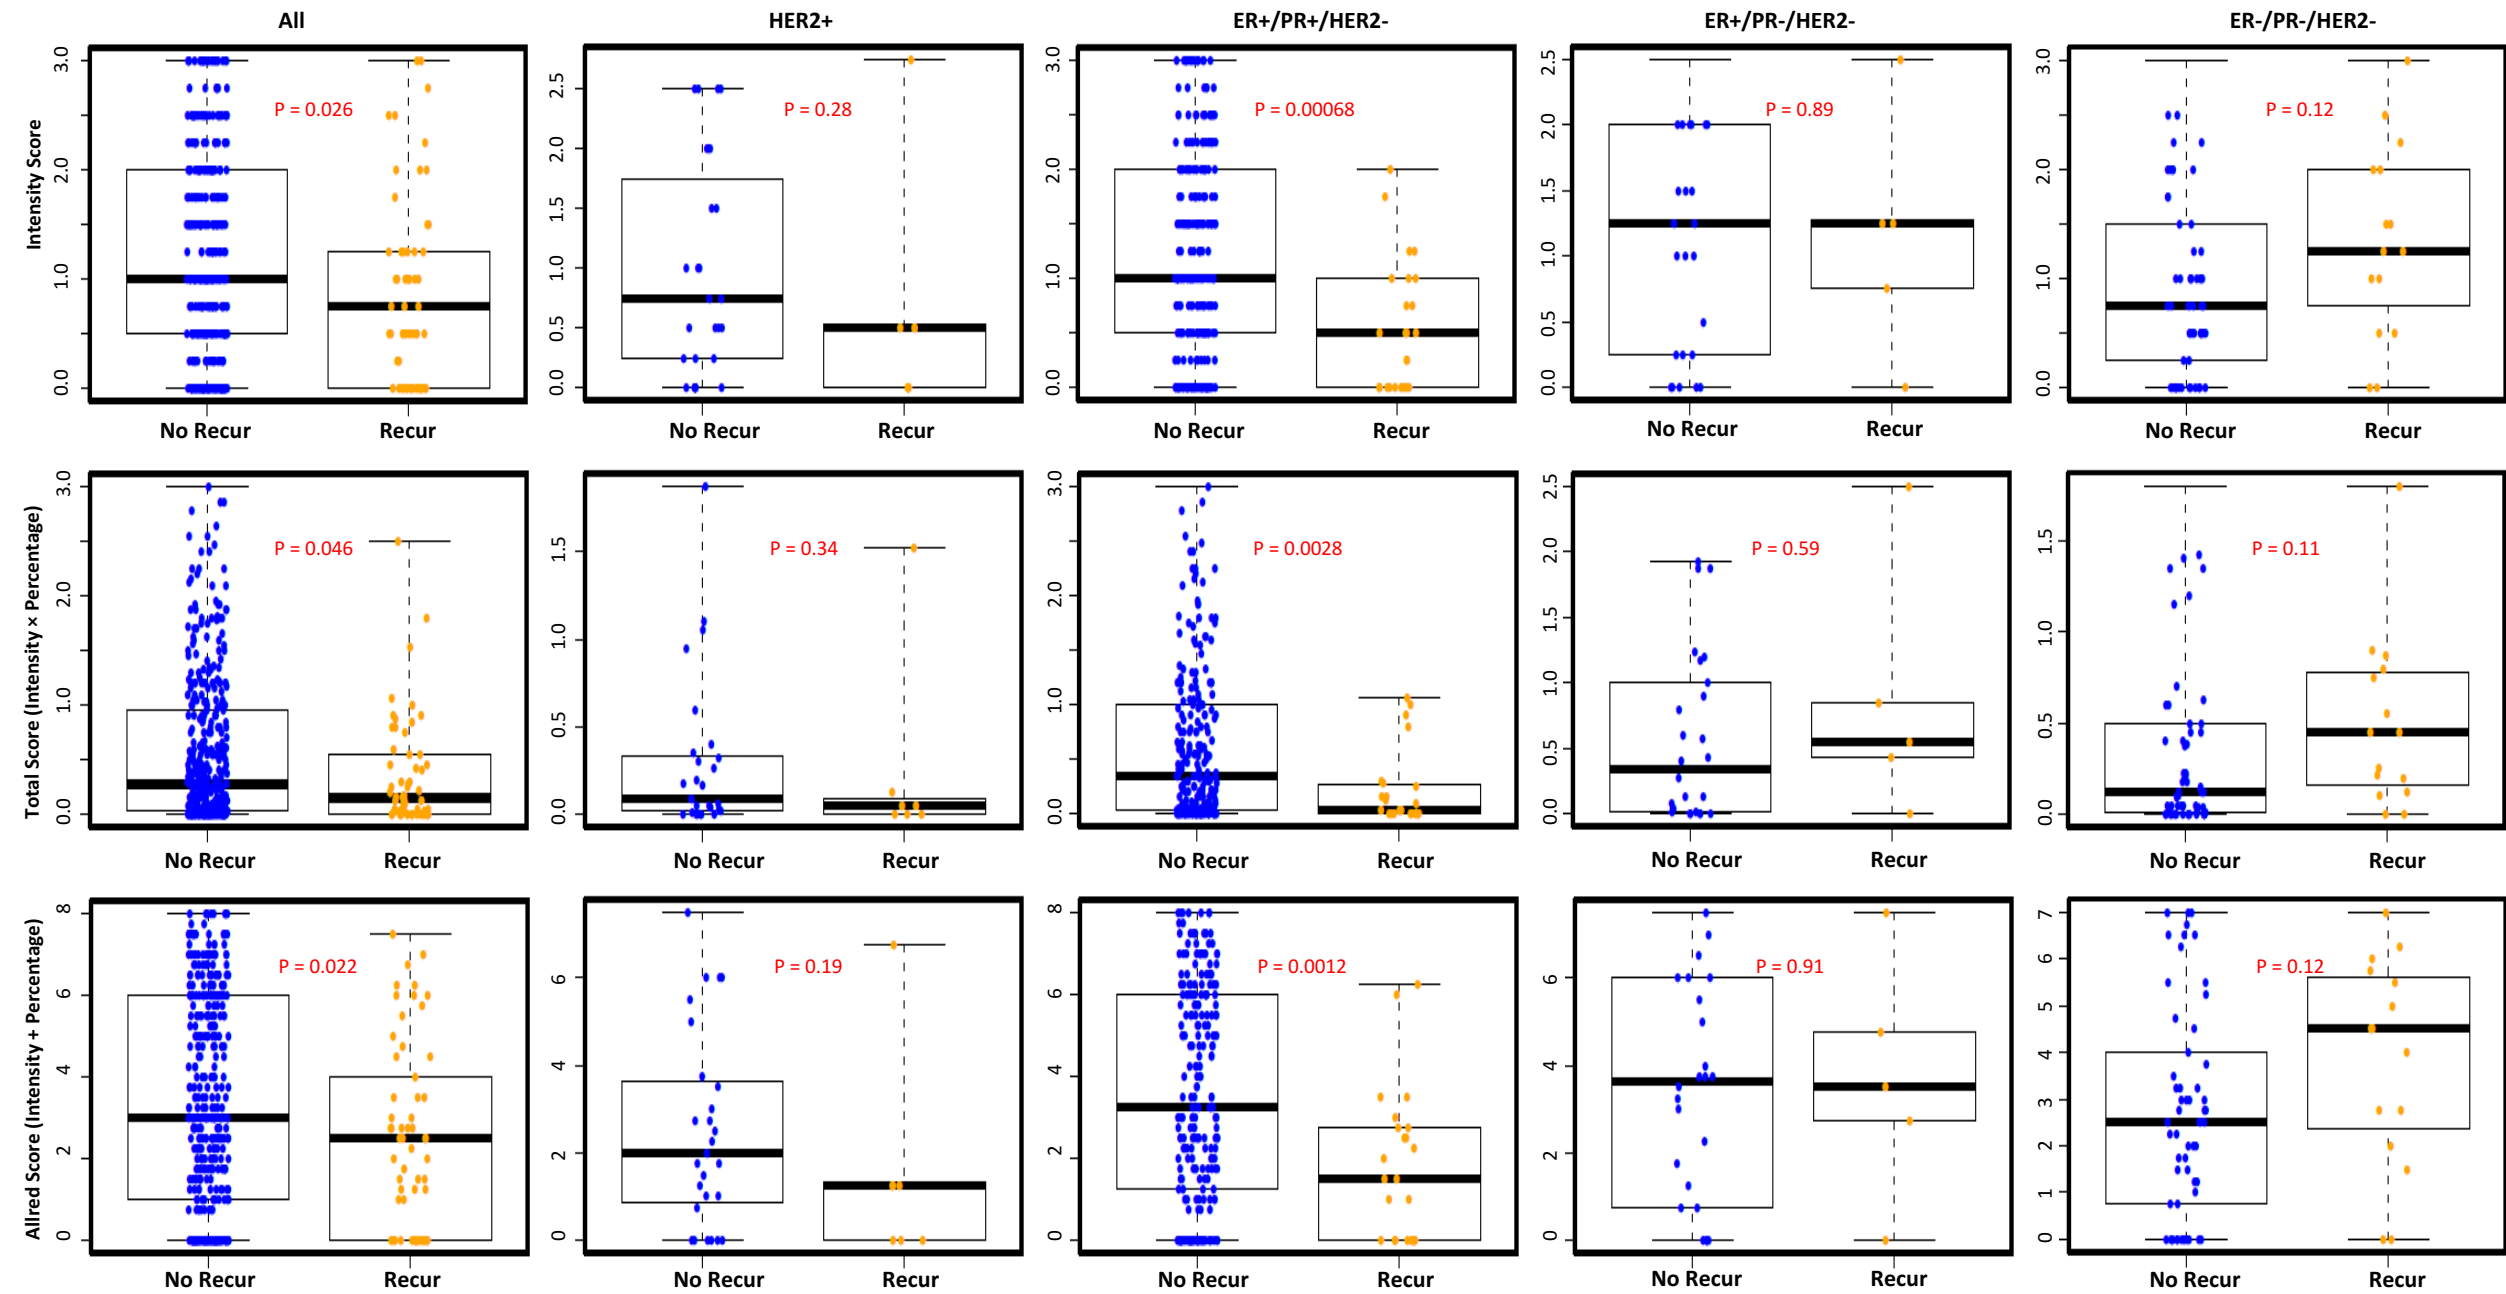

**f****pCrk/CrkL (Nucleus/Cytoplasm)**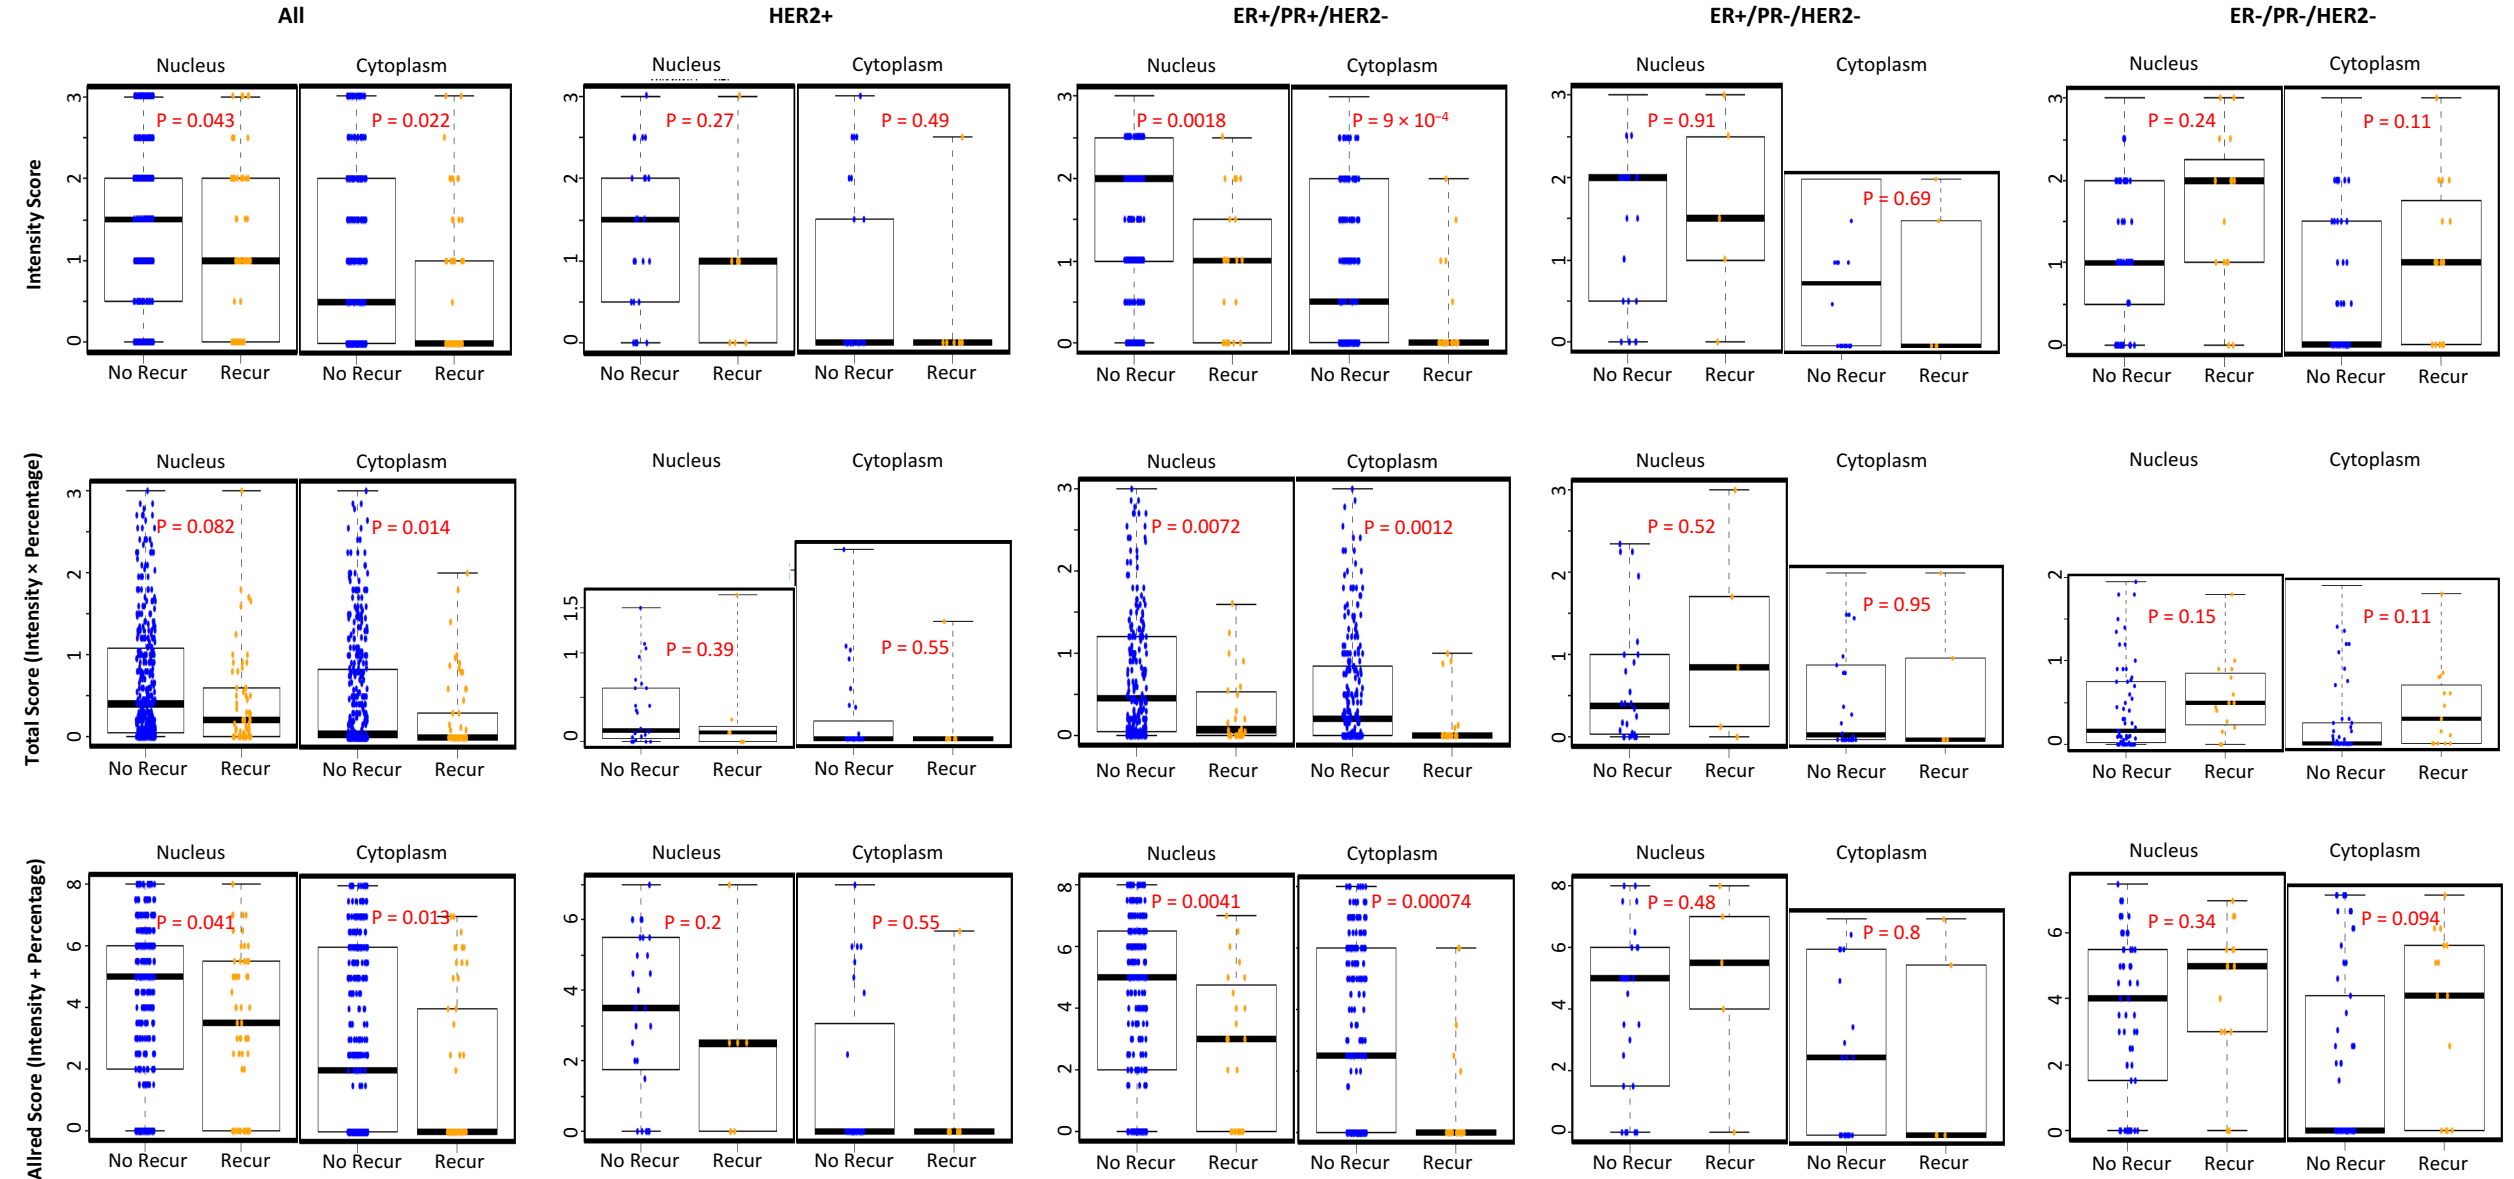

Supplement: NIHMS1515270-supplement-10552_2018_1099_MOESM3_ESM.pdf [file NIHMS1515270-supplement-10552_2018_1099_MOESM3_ESM.pdf]
